# Supplementary material for: Morphological and cytokine profiles as key parameters to distinguish between Gram-negative and Gram-positive bacterial keratitis
Source: PubMed Central journal article supplement (PMC7674500; doi:10.1038/s41598-020-77088-w), 2020-11-18
Supplement: 41598_2020_77088_MOESM1_ESM.pdf [file 41598_2020_77088_MOESM1_ESM.pdf]

**Morphological and cytokine profiles as key parameters to  
distinguish between Gram-negative and Gram-positive bacterial  
keratitis**

Aris Konstantopoulos<sup>1,2\*</sup>, Maria del Mar Cendra<sup>2\*</sup>, Michael Tsatsos<sup>3</sup>, Mariam  
Elabiary<sup>1</sup>, Myron Christodoulides<sup>2</sup>, Parwez Hossain<sup>1,2#</sup>

**Supplementary Information**

**Supplementary Table 1.** Correlation analysis of Corneal Tissue Inflammation and Corneal Tissue Loss

| Parameter                         | CTI        |         | CTL        |         |
|-----------------------------------|------------|---------|------------|---------|
|                                   | Spearman r | p-value | Spearman r | p-value |
| Presentation logMAR VA            | 0.610      | <0.001  | 0.603      | 0.001   |
| Presentation epithelial defect    | 0.553      | <0.001  | 0.520      | 0.004   |
| Presentation infiltrate diameter  | 0.693      | <0.001  | 0.423      | 0.040   |
| Presentation infiltrate thickness | 0.662      | <0.001  | 0.432      | 0.031   |
| Presentation corneal thickness    | NA         |         | 0.578      | 0.001   |
| CTI                               | NA         |         | 0.547      | 0.002   |
| Final corneal thickness           | 0.610      | <0.001  | NA         |         |
| Final logMAR VA                   | 0.090      | 0.577   | 0.448      | 0.017   |
| CTL                               | 0.547      | 0.002   | NA         |         |

CTI: corneal tissue inflammation, CTL: corneal tissue loss, r: correlation coefficient, VA: visual acuity

**Supplementary Table 2:** Cytokines and chemokines concentration in the tears of BK patients compared to controls

| Cytokine      | BK (pg/ml)        |              | Controls (pg/ml) |              | BK/Controls | p-value |
|---------------|-------------------|--------------|------------------|--------------|-------------|---------|
|               | Mean [SD]         | Median [IQR] | Mean [SD]        | Median [IQR] |             |         |
| IL-1 $\beta$  | 50.24 [90.04]     |              | 0.12 [0.19]      |              | 419         | <0.001  |
|               | 9.85 [60.64]      |              | 0.00 [0.30]      |              | NP          |         |
| IFN- $\gamma$ | 111.24 [242.68]   |              | 1.35 [1.57]      |              | 82          | 0.001   |
|               | 25.40 [12.78]     |              | 0.71 [3.00]      |              | 36          |         |
| GM-CSF        | 15.39 [26.31]     |              | 0.64 [0.52]      |              | 24          | <0.001  |
|               | 8.82 [12.78]      |              | 0.57 [0.82]      |              | 15          |         |
| IL-10         | 17.97 [39.79]     |              | 0.22 [0.30]      |              | 82          | 0.003   |
|               | 4.70 [8.76]       |              | 0.02 [0.54]      |              | 235         |         |
| IL-12p70      | 17.10 [37.73]     |              | 0.98 [1.05]      |              | 17          | 0.10    |
|               | 5.77 [12.06]      |              | 0.77 [1.54]      |              | 7           |         |
| IL-2          | 12.16 [14.75]     |              | 0.36 [0.27]      |              | 34          | <0.001  |
|               | 7.62 [15.24]      |              | 0.41 [0.82]      |              | 19          |         |
| IL-6          | 370.15 [431.83]   |              | 0.63 [0.20]      |              | 587         | <0.001  |
|               | 205.18 [609.04]   |              | 0.58 [1.16]      |              | 354         |         |
| IL-8          | 1129.03 [1518.37] |              | 18.54 [17.98]    |              | 61          | 0.001   |
|               | 358.77 [2197.64]  |              | 15.02 [32.74]    |              | 24          |         |
| TNF- $\alpha$ | 33.25 [71.44]     |              | 0.84 [0.78]      |              | 40          | 0.007   |
|               | 9.98 [18.98]      |              | 0.86 [1.72]      |              | 12          |         |

BK: bacterial keratitis, IQR: interquartile range, NP: not possible

**Supplementary Table 3.** Concentrations cytokines and chemokines from presentation to days 3, 7 and 14 of treatment

| <b>Cytokine</b>                       | <b>Day 0</b>                                      | <b>Day 3</b>                                      | <b>Day 7</b>                                      | <b>Day 14</b>                                     |                |
|---------------------------------------|---------------------------------------------------|---------------------------------------------------|---------------------------------------------------|---------------------------------------------------|----------------|
| <b>Cytokine concentration (pg/ml)</b> |                                                   |                                                   |                                                   |                                                   |                |
|                                       | <b>Mean [SD]<br/>Median [IQR]<br/>BK/controls</b> | <b>Mean [SD]<br/>Median [IQR]<br/>BK/controls</b> | <b>Mean [SD]<br/>Median [IQR]<br/>BK/controls</b> | <b>Mean [SD]<br/>Median [IQR]<br/>BK/controls</b> | <b>p-value</b> |
| IL-1 $\beta$                          | 35.47 [36.08]<br>15.83 [62.74]<br>295.6           | 1.60 [1.03]<br>1.89 [2.08]<br>13.3                | 1.69 [1.35]<br>1.69 [2.68]<br>14.1                | 1.35 [1.44]<br>0.55 [2.62]<br>11.3                | 0.034          |
| IFN- $\gamma$                         | 26.26 [18.51]<br>22.03 [30.94]<br>19.5            | 24.74 [13.42]<br>12.04 [23.84]<br>18.3            | 8.99 [9.89]<br>7.62 [12.08]<br>6.7                | 9.08 [7.09]<br>7.92 [10.36]<br>6.7                | 0.037          |
| GM-CSF                                | 7.37 [5.23]<br>8.82 [9.76]<br>11.5                | 2.35 [1.57]<br>1.97 [2.94]<br>3.7                 | 2.39 [1.88]<br>1.70 [3.84]<br>3.7                 | 2.08 [1.39]<br>1.74 [1.94]<br>3.3                 | 0.068          |
| IL-10                                 | 4.06 [3.16]<br>4.70 [4.94]<br>18.4                | 0.92 [1.21]<br>0.42 [2.64]<br>4.2                 | 1.11 [1.56]<br>0.31 [1.96]<br>5.0                 | 0.38 [0.43]<br>0.24 [0.56]<br>1.7                 | 0.059          |
| IL-12p70                              | 6.62 [7.78]<br>5.77 [4.96]<br>6.8                 | 1.60 [1.12]<br>1.14 [2.02]<br>1.6                 | 1.29 [1.28]<br>0.85 [2.16]<br>1.3                 | 1.44 [1.27]<br>1.13 [1.00]<br>1.5                 | 0.068          |
| IL-2                                  | 11.60 [13.98]<br>7.62 [9.14]<br>32.2              | 1.32 [0.98]<br>0.99 [1.90]<br>3.7                 | 1.18 [1.06]<br>0.89 [0.70]<br>3.3                 | 1.22 [0.84]<br>0.87 [0.88]<br>3.4                 | 0.04           |
| IL-6                                  | 407.94 [359.38]<br>244.94 [576.46]<br>647.5       | 18.81 [26.51]<br>8.55 [26.00]<br>29.9             | 5.31 [5.14]<br>3.05 [7.48]<br>8.4                 | 2.68 [2.90]<br>1.62 [2.40]<br>4.3                 | <0.001         |
| IL-8                                  | 1122.52 [1321.48]<br>363.46 [2770.90]<br>60.5     | 137.13 [77.84]<br>124.10 [84.76]<br>7.4           | 113.07 [141.77]<br>55.99 [175.50]<br>6.1          | 73.91 [77.84]<br>30.43 [138]<br>4.0               | 0.004          |
| TNF- $\alpha$                         | 8.75 [6.71]<br>6.31 [7.48]<br>10.4                | 3.59 [3.04]<br>2.79 [6.44]<br>4.3                 | 2.08 [2.12]<br>1.71 [2.30]<br>2.5                 | 2.44 [1.70]<br>1.96 [2.20]<br>2.9                 | 0.006          |

BK: bacterial keratitis, IQR: interquartile range
